# Supplementary material for: Flexible π-stacked organic frameworks with dynamic electronic interactions for highly efficient photocatalytic hydrogen evolution
Source: Research Square preprint supplement (doi:10.21203/rs.3.rs-6890653/v1), 2025-06-27
Supplement: Supplementary file 1 [file 0a3985b42c3df217b41782d9.docx]

**Supporting Information**

**Flexible π-stacked organic frameworks with** **dynamic electronic interactions for highly efficient photocatalytic hydrogen evolution**

Ran Zheng1†, Rito Yanagi2†, Xintong Yuan4†, Bin Liu2†, Dongfang Cheng4, Finn Babbe5, Tyler Kerr6, Xiaohan Ma2, Jialu Li7, Jinghua Guo7, Per-Anders Glans-Suzuki7, Shibo Xi8, Bo Wu9, Junkai Liu1, Yu-Che Lin1, Yi-Ting Sheu1, Yichen Li4, Wenxin Yang1, Eric C.H. Yeh1, Joshua Huang1, Alena Yang1, Joshua Lee1, Yingyin Zhu1, Philippe Sautet4,6, Yuzhang Li4, Dong Meng3*, Shu Hu2*, Yang Yang1*

1Department of Materials Science and Engineering and California NanoSystems Institute, University of California, Los Angeles, California 90095, United States.

2Department of Chemical and Environmental Engineering, Yale University, New Haven, Connecticut 06520, United States.

3State Key Laboratory of Synergistic Chem-Bio Synthesis, School of Chemistry and Chemical Engineering and Zhangjiang Institute for Advanced Study, Shanghai Jiao Tong University, Shanghai, 200240, China.

4Department of Chemical and Biomolecular Engineering, University of California, Los Angeles, California 90095, United States.

5Chemical Sciences Division, Lawrence Berkeley National Laboratory, Berkeley, California 94720, United States.

6Department of Chemistry and Biochemistry, University of California, Los Angeles, California 90095, United States.

7Advanced Light Source, Lawrence Berkeley National Laboratory, Berkeley, California 94720, United States.

8Institute of Sustainability for Chemical, Energy and Environment (ISCE2), Agency for Science, Technology and Research (A*STAR), 1 Pesek Road, 627833, Republic of Singapore.

9Department of Chemical and Biomolecular Engineering, National University of Singapore, Singapore, 117580, Republic of Singapore.

†Additional author notes: Ran Zheng, Rito Yanagi, Xintong Yuan, and Bin Liu contributed equally to this work.

*Corresponding authors: Email: [dongmeng2017@sjtu.edu.cn](mailto:dongmeng2017@sjtu.edu.cn); [shu.hu@yale.edu](mailto:shu.hu@yale.edu); [yangy@ucla.edu](mailto:yangy@ucla.edu).

**Materials and Methods**

Materials: All reagents and chemicals were purchased from commercial sources and used without further purification. All anhydrous organic solvents for the synthesis, characterization, and device fabrication steps were purchased from Sigma-Aldrich and TCI. 5-bromo-4-((2-ethylhexyl)oxy)thiophene-2-carbaldehyde was prepared via synthetic condition from literature1. Surfactant 2-(3-thienyl)ethyloxybutylsulfonate sodium salt (TEBS) was purchased from Solaris Chem. 1H NMR (400 MHz) and 13C NMR (400 MHz) spectra were recorded in deuterated solvents on a Bruker ADVANCE 400 NMR spectrometer. *J* values are expressed in Hz and quoted chemical shifts are in ppm. The signals have been designated as follows: s (singlet), d (doublet), t (triplet), q (quartet), sd (singlet doublet), dd (doublet doublet), ddd (doublet of doublets of doublets), td (triplet doublet) and m (multiplets). Thin-film (on quartz substrate) and solution absorption spectra were recorded on a 4100 Hitachi spectrofluorophotometer. The contact angle was obtained by VCA optima 100 with water and DIM. Cyclic voltammograms (CVs) were recorded on an Epsilon electrochemical workstation using glassy carbon discs as the working electrode, Pt wire as the counter electrode, Ag/AgCl electrode as the reference electrode at a scanning rate of 100 mV/s. 0.1 M tetrabutylammoniumhexafluorophosphate (Bu4NPF6) dissolved in CH3CN was used as the supporting electrolyte. XPS measurements were carried out on an XPS AXIS Ultra DLD (Kratos Analytical). An Al Kα (1486.6 eV) X-ray was used as the excitation source. For the XRD measurement, an X-ray PANalytical diffractometer with Cu Kα radiation at a scan rate of 3° min−1 was used. Ar adsorption-desorption isotherms were obtained on a Micromeritics ASAP 2020 Accelerated Surface Area and Porosimetry System at 87 K. Pore size distributions were estimated using non-local density functional theory (NLDFT) model. The surface areas were calculated by the BET (Brunauer-Emmett-Teller) method. Photoluminescence/Fluorescence lifetime was measured by FLS1000 Photoluminescence Spectrometer (Edinburgh Instrument).

**X-Ray Single-Crystal Diffraction Analyses**

The single crystals of πOF-1 were obtained by the slow vapor diffusion method under toluene (a good solvent for πOF-1) and hexane (a poor solvent for πOF-1). A blue, rod-shaped crystal of πOF-1 was mounted on a MiTeGen micromount. Data were collected from a shock-cooled single crystal at 100(2) K on a Bruker D8 Venture four-circle goniometer with a sealed X-ray tube using a PHOTON III CPAD detector. The diffractometer used Cu*K*α radiation (λ = 1.54178 Å). All data were integrated to 0.95A with SAINT and a multi-scan absorption correction using TWINABS2,3. Solution and refinement was completed on the detwinned major component. The structure was solved by direct methods using SHELXT and refined by full-matrix least-squares methods against *F*2 by SHELXL-2018/3 using ShelXle4-6. Refinement of the heavy atoms required significant restraints and on the ADPs on disordered parts. On alkyl carbons, C-C bond lengths were restrained to 1.54Å with beta carbons restrained to the same distances along the arms. sp and sp2 CH2 hydrogen atoms were refined using a riding model, sp3 CH3 hydrogen atoms were refined using a fixed model. The weighting scheme was manually refined to minimize outlier reflections and w*R*2. Solvent (toluene) was removed from the structure using SQUEEZE as an implementation of Platon7-9. The CIF was generated using FinalCif10.

**Cryogenic Electron Microscopy (Cryo-EM)**

Cryo-EM characterizations were conducted using an FEI Titan 80-300 scanning transmission electron microscope operating at 300 kV. The microscope was equipped with a field-emission gun, an energy-dispersive X-ray spectroscopy detector, and an Ultrascan 2 × 2 K digital camera. πOF-1 samples were drop-casted onto a TEM grid and loaded into a Gatan 626 TEM cryo-transfer holder. Because πOF-1 samples are not air-sensitive, all sample transfers were carried out under ambient conditions. After the holder was inserted into the microscope column, liquid nitrogen was added to the dewar on the tip of the cryo-transfer holder to maintain the sample at cryogenic temperature, minimizing beam damage during the whole imaging process.

**Nanoparticle Fabrication and Hydrogen Evolution Measurements**

Nanoparticle precursor solutions (1.00 mg ml−1) of πOF-1 were prepared in chloroform. The solutions were heated and stirred at 50 °C for 2 h in a glass vial to ensure complete dissolution. 4 ml of aqueous solution with 1mg of surfactant TEBS was added to the 1 ml nanoparticle precursor solutions. The mixture was heated and stirred at 60 °C for 1 h and then ultrasonicated at 30% amplitude for 5 min using probe sonication. After emulsion, the chloroform was evaporated by heating at 60 °C for 3 h. Additional water was added every hour to compensate for the water and chloroform loss. Hydrogen evolution from πOF-1 particles was measured using ascorbic acid as a sacrificial electron donor and Pt as a cocatalyst. πOF-1 particles in 0.2 M ascorbic acid (10 ml of solution volume in total) were loaded into a home-made closed-loop photoreactor. The details of the photoreactor setup can be found in previous publications11. The desired Pt loading was achieved by adding a specific amount of aqueous potassium hexachloroplatinate solution. Before light illumination, the reactor was evacuated and purged with argon five times to remove oxygen, and the pressure was set to 100 Torr. The suspension was stirred and illuminated with a 300 W Xe lamp fitted with an AM1.5 filter, and H2 evolution was quantified by an online gas chromatograph equipped with a thermal conductivity detector.

For KI-mediated hydrogen evolution, Pt was first photo-deposited on πOF-1 particles following the same procedure above. The reaction was kept at 70 °C for 5 h under stirring before being drop-casted on a 1”×1” frosted glass at 60 °C. Then, the catalyst on the panel was coated with TiO2 via photo-driven vapor-phase deposition at 30 °C, where a blue LED lamp (425 nm) served as the light source with 55 mW light intensity, and titanium isopropoxide (TTIP) and water were used as the Ti source and O source, respectively. The coated panel was then immersed in a photoreactor containing phosphate buffer solution (BPS, pH = 10.5) with 10 or 100 mmol KI as the redox mediator. The hydrogen evolution under 70 °C was evaluated following the same procedure described above.

The integration of reversible redox mediators is crucial because it enables the continuous recycling of electron acceptors and donors, thereby avoiding the depletion issues inherent to irreversible systems, where sacrificial agents such as AA are consumed stoichiometrically. Moreover, reversible redox mediators cycled in the solar concentrator reactor allow spatial decoupling of the reduction and oxidation half-reactions, supporting hydrogen and oxygen evolution at distinct catalytic sites or in separate reactor chambers. This spatial separation reduces charge recombination and gas crossover, enhances operational safety, and aligns with the design principles of scalable solar fuel generators, as demonstrated in redox-mediated water-splitting reactors.

**Calculation of Internal Quantum Efficiency**

The internal quantum efficiency (IQE) of the πOF-1 particle solution was evaluated based on its hydrogen evolution rate, UV-Vis absorption spectrum, and the AM 1.5G incident solar spectrum.
Internal quantum efficiency is defined as the ratio of the number of effective photo-induced electrons (used for hydrogen production) to the number of incident photons absorbed by the photocatalyst, πOF-1 particles solutions:

Where:
RH2 = hydrogen evolution rate (mol/s)

NA ​= Avogadro constant (6.022×1023 mol−1)

Nabsorbed ​= number of photons absorbed per second

Φabs,total = total absorbed photon flux

Jph = photocurrent density

q = elementary charge (1.602 × 10−19 C)

A = illuminated area in m2

The factor of 2 accounts for the fact that 2 electrons (i.e., 2 photons in ideal single-photon systems) are required to produce one molecule of H2.

Photocatalytic hydrogen evolution was conducted in an aqueous suspension containing 1 mg of πOF-1 photocatalyst dispersed in 10 mL of water, with an optical path length of 0.4 cm. The reactor was illuminated under simulated sunlight (AM 1.5G, 100 mW cm-2) over a circular area with a diameter of 50.33 mm. Under these conditions, the hydrogen evolution rate reached 152 mmol h-1 g-1 at room temperature and 618 mmol h-1 g-1 at 70 °C.

The UV-Vis absorbance A(λ) was measured for the πOF-1 particle solutions at 0.5 mg/10 mL in a quartz cuvette with a 1 cm optical pathlength (**Supplementary Fig. 13**). The baseline irregularity near 450 nm caused by the absorption of the surfactant TEBS was corrected12. The UV-Vis absorbance measured in a 1 cm cuvette with a solution concentration of 0.5 mg/10 mL was scaled to match the reactor condition (1 mg/10 mL, 0.4 cm path) using Beer–Lambert law:

where *ε* is the molar absorptivity, is concentration, and is the optical path length.

This adjusted absorbance reflects the actual light absorption inside the photocatalytic reactor.

The absorbance was converted to absorption fraction α using:

We calculated the average absorption fraction at 10 nm intervals from 450 nm to 750 nm (**Supplementary Table 3**) and further calculated the photocurrent (Jph = 9.39 mA/cm2) based on these values.

At room temperature:

At 70 °C:

**Transient Absorption Method**

Transient transmission kinetics are measured with a modified system from Ultrafast systems. A coherent laser system (Libra) generates 100 fs pulses at a wavelength of 810 nm. The pump pulse with a wavelength of 580 nm is accomplished using optical parametric amplification (Opera Solo) and supercontinuum white light by using CaF2 crystals. The system is equipped with multiple sets of grating spectrometers for detection in the visible and near-infrared range.

**S K-Edge X-ray Absorption Method**

Sulfur K-edge XAS data were collected at the Stanford Synchrotron Radiation Lightsource (SSRL) on the unfocused 20-pole, 2.0 T wiggler Beamline 4-3, operating under SPEAR3 storage ring conditions of 3 GeV and 500 mA. The incident X-rays were monochromatized using a Si(111) double-crystal monochromator, and their intensity was monitored by an ion chamber (I₀) positioned upstream of the sample. Measurements were performed in fluorescence mode with a four-element Vortex detector. Solid samples were ground into powder, dispersed on Kapton tape as the backing, and sandwiched with a sulfur-free polypropylene film as the front layer. The monochromator energy was calibrated to the S 1s → σ (S=O) peak of a thiosulfate reference sample, assigned at 2482 eV. Data normalization was achieved by fitting a straight line to the post-edge region and adjusting the edge jump to 1.0 at 2490.0 eV.

**General Computational Methods**

Vienna ab initio simulation package (VASP)13 was used to carry out density functional theory (DFT) calculations with the strongly constrained and appropriately normed functional14. The cut-off energy is 400 eV. The interactions between the atomic cores and electrons were described by the projector augmented wave (PAW) method15. a Γ point only k-point mesh is used for molecules. All structures were optimized until the force and energy on each atom was less than 0.02 eV/Å and 10-6 eV. The calculations of Gibbs free energies include thermal effects, zero point energies, and entropic contributions, where translational, rotational, and vibrational degrees of freedom were taken into account for gaseous species. For adsorbed species, Harmonic Oscillator (HO) approximation was used and only vibrational contributions were considered. πOF-1 was modelled with a quarter fragment and (3*3) – 4 layer Pt(111), (3*3) – 4 layer Pt(100) and (1*3)-4layer Pt(211) slabs were modelled to represent the possible Pt sites.

**Synthetic Details**


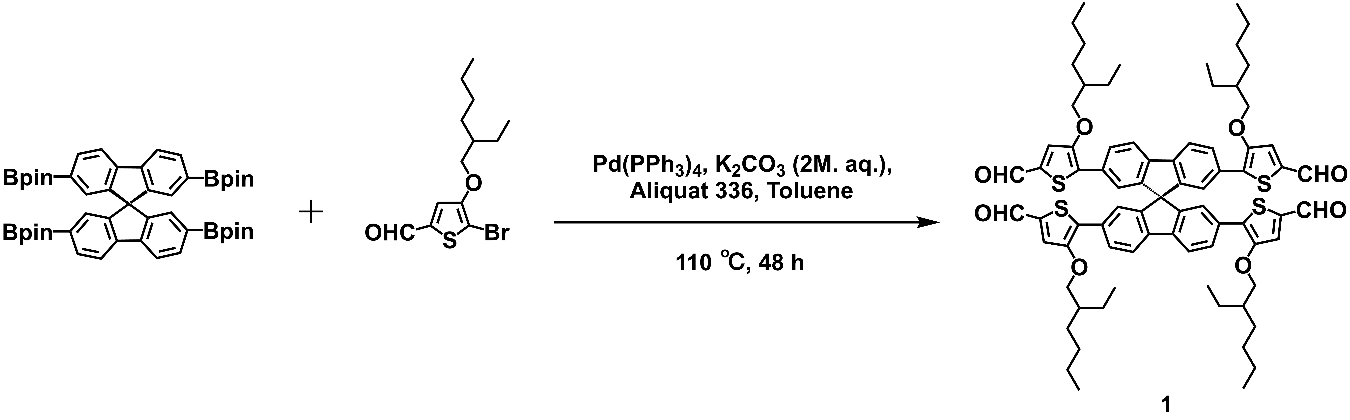
**Compound 1:** A Schlenk flask was charged with 2,2',7,7'-tetrakis(pinacolatoboryl)- 9,9'-Spirobi[*9H*-fluorene] (500 mg, 0.61 mmol, 1.0 equiv), 5-bromo-4-((2-ethylhexyl)oxy)thiophene-2-carbaldehyde (974 mg, 3.05 mmol, 5.0 equiv), Toluene (12 ml), K2CO3 aqueous solution (2M, 6 ml) and 0.1 mL Aliquat 336 as the phase transfer catalyst. The mixture was degassed with argon for 15 min. Pd(PPh3)4 (142 mg, 0.122 mmol, 0.2 equiv) was added under an argon atmosphere. The mixture was refluxed for 48 h and then cooled to room temperature. 50 mL of water was added and the mixture was extracted with dichloromethane (3 × 50 mL). The organic phase was dried over anhydrous MgSO4. After removing the solvent, the residue was purified by column chromatography on silica gel, eluted with pure dichloromethane to afford the compound **1** (564 mg, 73% yield) as a sticky yellow solid.

1H NMR (400 MHz, CDCl3, 298.5 K) δ = 9.70 (s, 4 H), 7.84 (d, *J* = 8.09 Hz, 4 H), 7.73 (ddd, *J*1= 8.07 Hz, *J*2= 6.47 Hz, *J*3= 1.95 Hz, 4 H), 7.52 (dd, *J*1= 3.69 Hz, *J*2= 3.53 Hz, 4 H), 7.38 (s, 4 H), 3.83 (d, *J* = 4.10 Hz, 8 H), 1.36-1.22 (m, 4 H), 1.12-0.90 (m, 32 H), 0.80-0.71 (m, 12 H), 0.64 (td, *J*1= 7.42 Hz, *J*2= 1.53 Hz, 12 H)


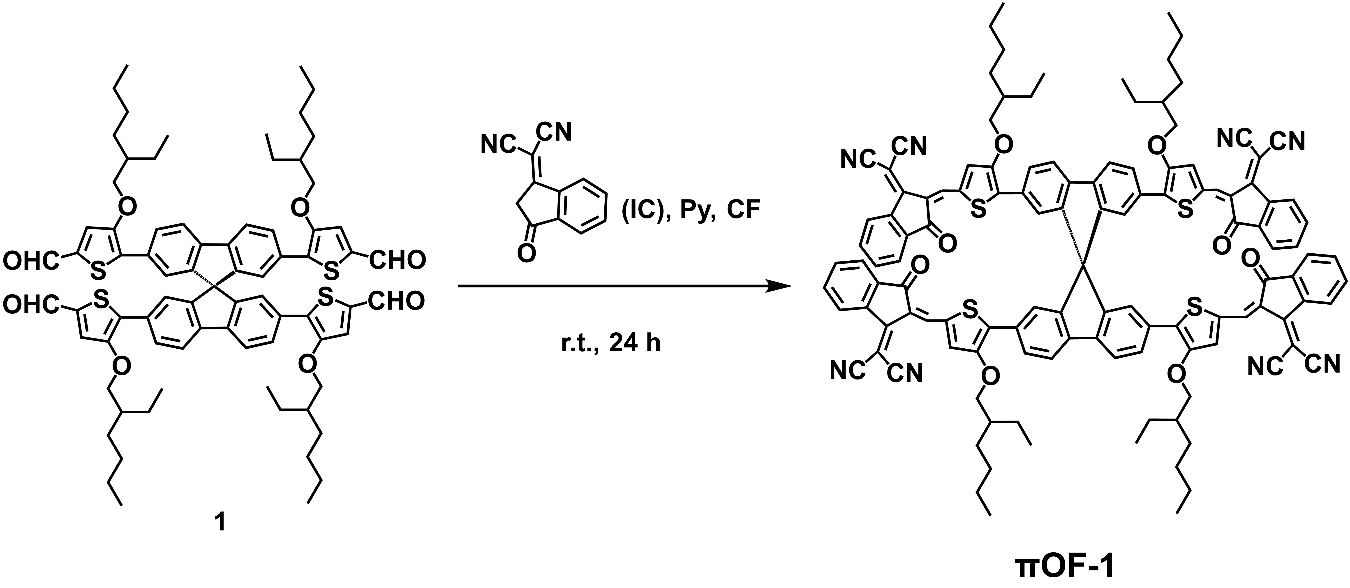


**πOF-1:** Compound **1** (100 mg, 0.079 mmol, 1 equiv) and 2-(3-oxo-2,3-dihydro-1Hinden-

1-ylidene) malononitrile (123 mg, 0.632 mmol, 8 equiv) were dissolved in CHCl3 (20 ml),

then pyridine (1 ml) was added under argon. The mixture was then stirred under room temperature for 24 h, poured into CH3OH (200 mL) and filtered. The crude product was purified with column chromatography using hexane/dichloromethane (1:2) as eluent to obtain pure **πOF-1** as a

black solid (136 mg, 87%).

1H NMR (400 MHz, CDCl3, 298.5 K) δ = 8.68-8.64 (m, 8 H), 8.03-7.87 (m, 12 H), 7.77-7.67 (m, 12 H), 7.52 (s, 4 H), 3.90 (d, *J* = 3.9 Hz, 8 H), 1.42-1.33 (m, 4 H), 1.15-0.94 (m, 32 H), 0.83-0.74 (m, 12 H), 0.69 (td, *J*1= 8.7 Hz, *J*2= 3.9 Hz, 12 H); 13C NMR (400 MHz, CDCl3, 298.5 K) δ = 187.17 160.10, 155.11, 148.73, 142.49, 140.95, 138.45, 136.90, 135.14, 134.12, 132.96, 132.25, 129.79, 129.58, 128.14, 125.32, 123.71, 122.96, 119.78, 119.45, 114.09, 72.80, 69.29, 61.41, 40.57, 30.59, 29.16, 23.62, 22.92, 13.50, 10.64.


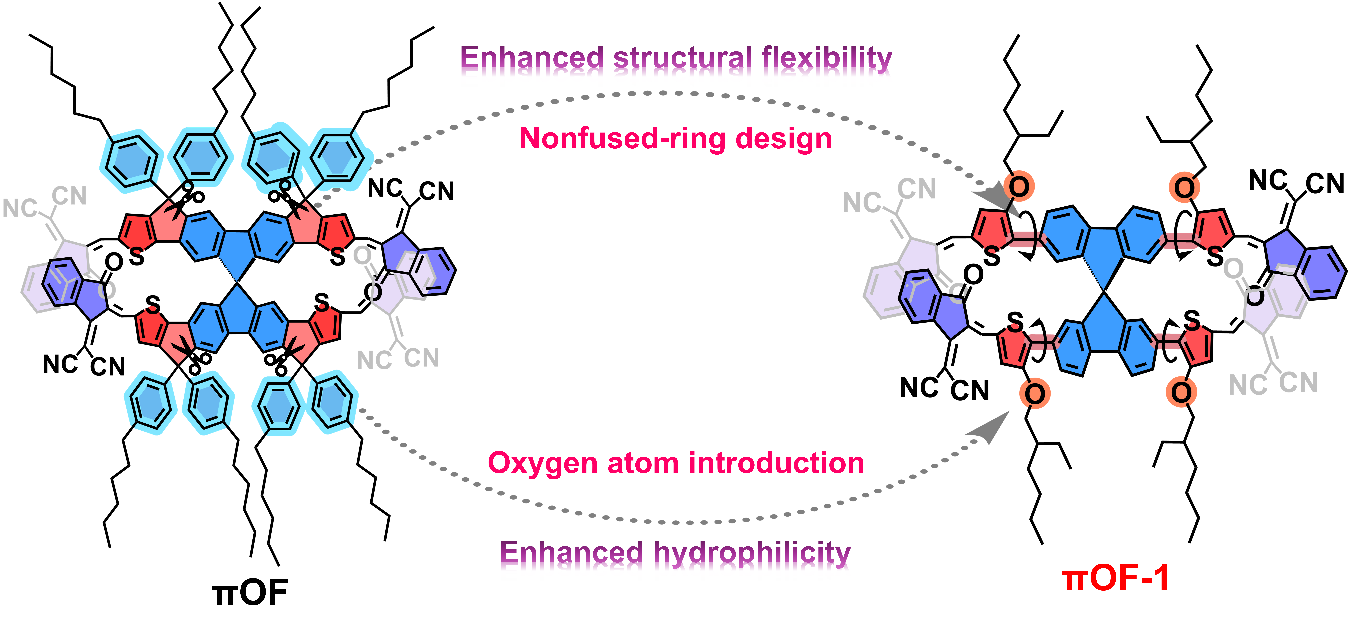


**Supplementary Fig. 1** | Design strategy of flexible πOF-1 with enhanced hydrophilicity, featuring its nonfused-ring structure and alkoxy side chains, in contrast to first-generation πOF based on fused-ring structure and aromatic side chains.


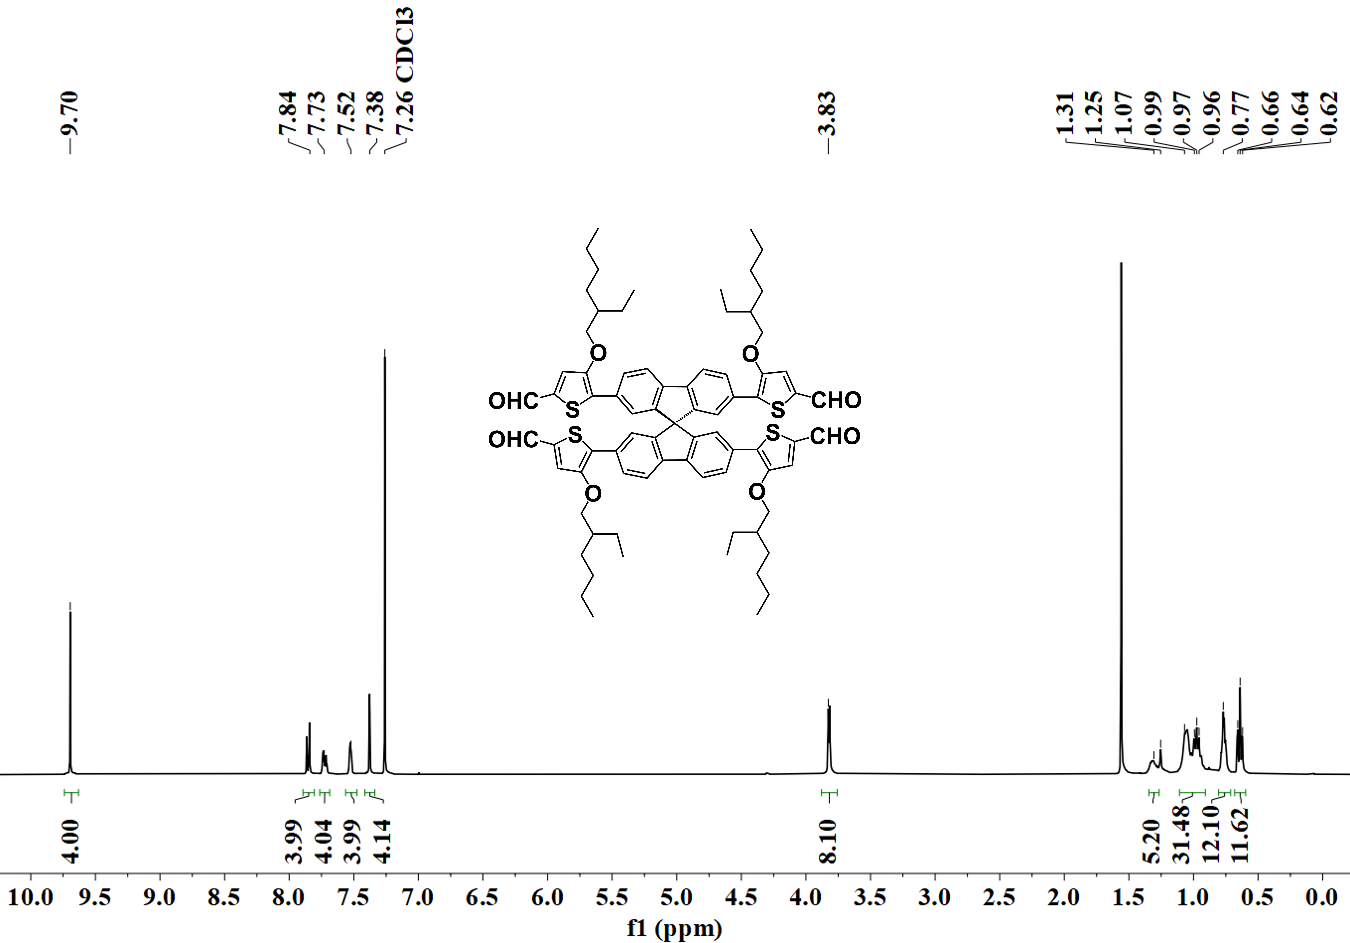


**Supplementary Fig. 2** | 1H NMR spectra of compound 1 (400 MHz, CDCl3, 298.5 K).


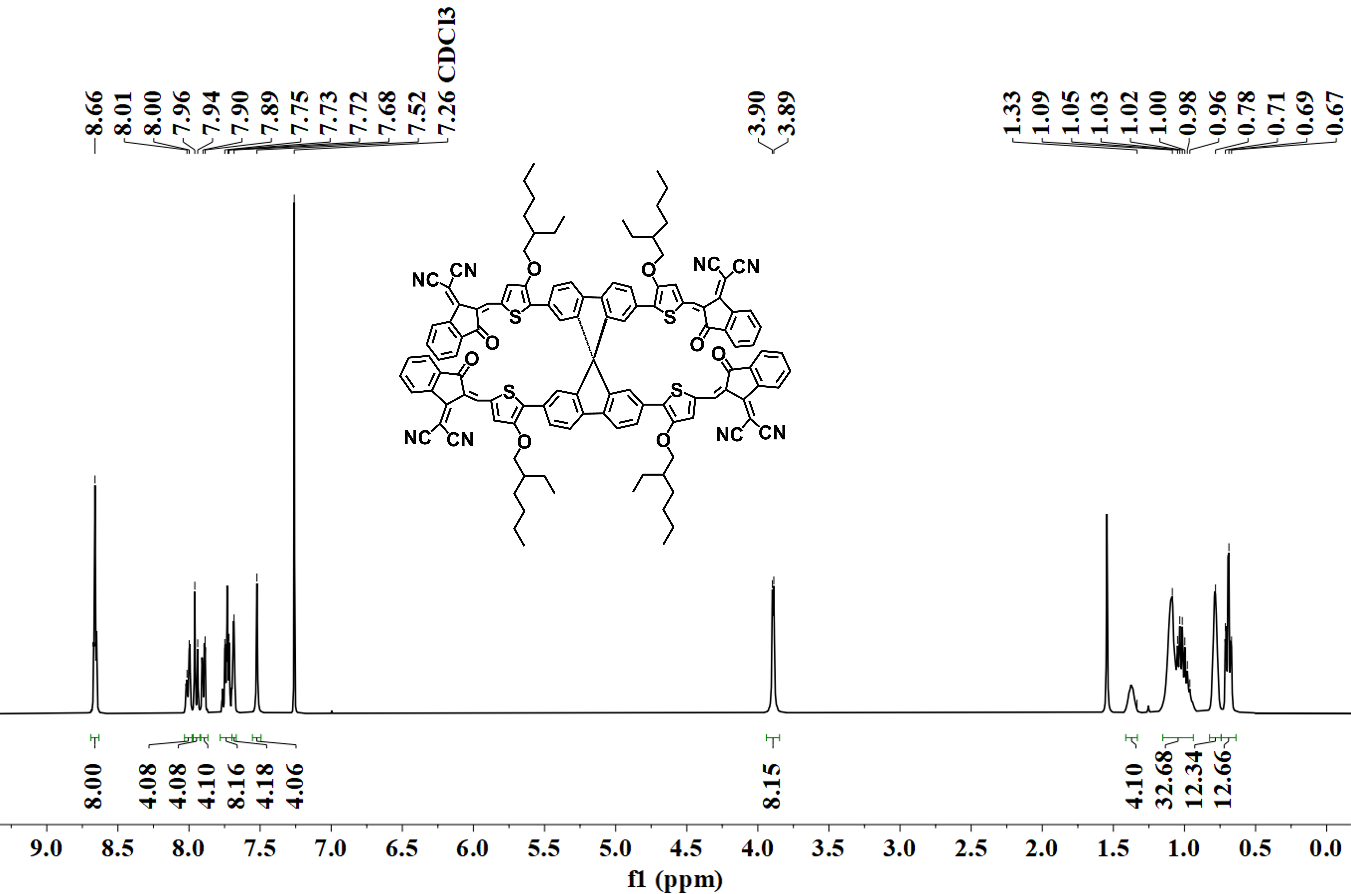


**Supplementary Fig. 3** | 1H NMR spectra of compound πOF-1 (400 MHz, CDCl3, 298.5 K).


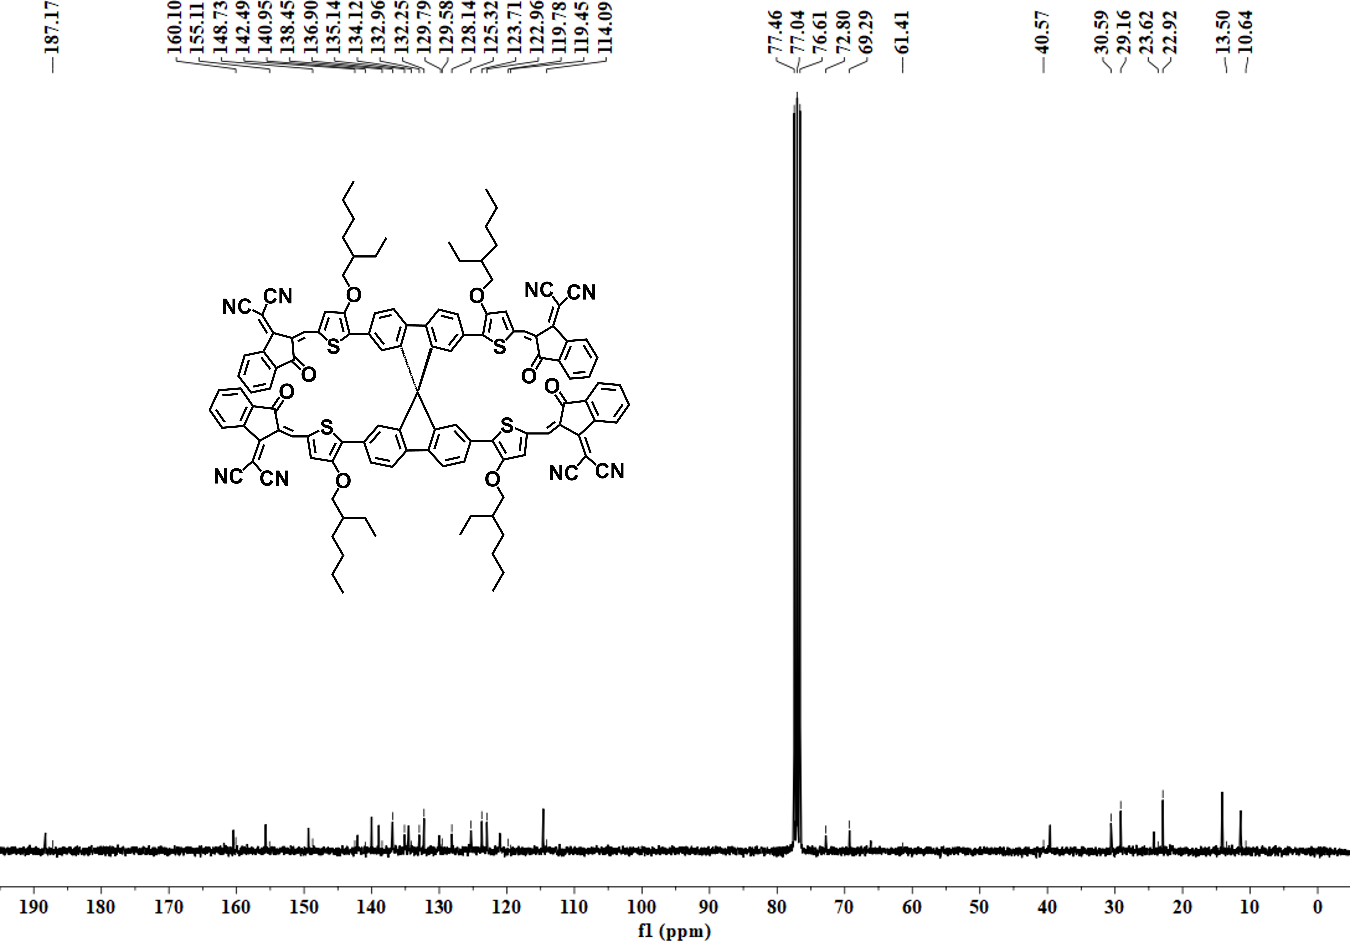


**Supplementary Fig. 4** |13C NMR spectra of πOF-1 (400 MHz, CDCl3, 298.5 K).





**Supplementary Fig. 5** | Thermogravimetric analysis (TGA) curve of πOF-1.


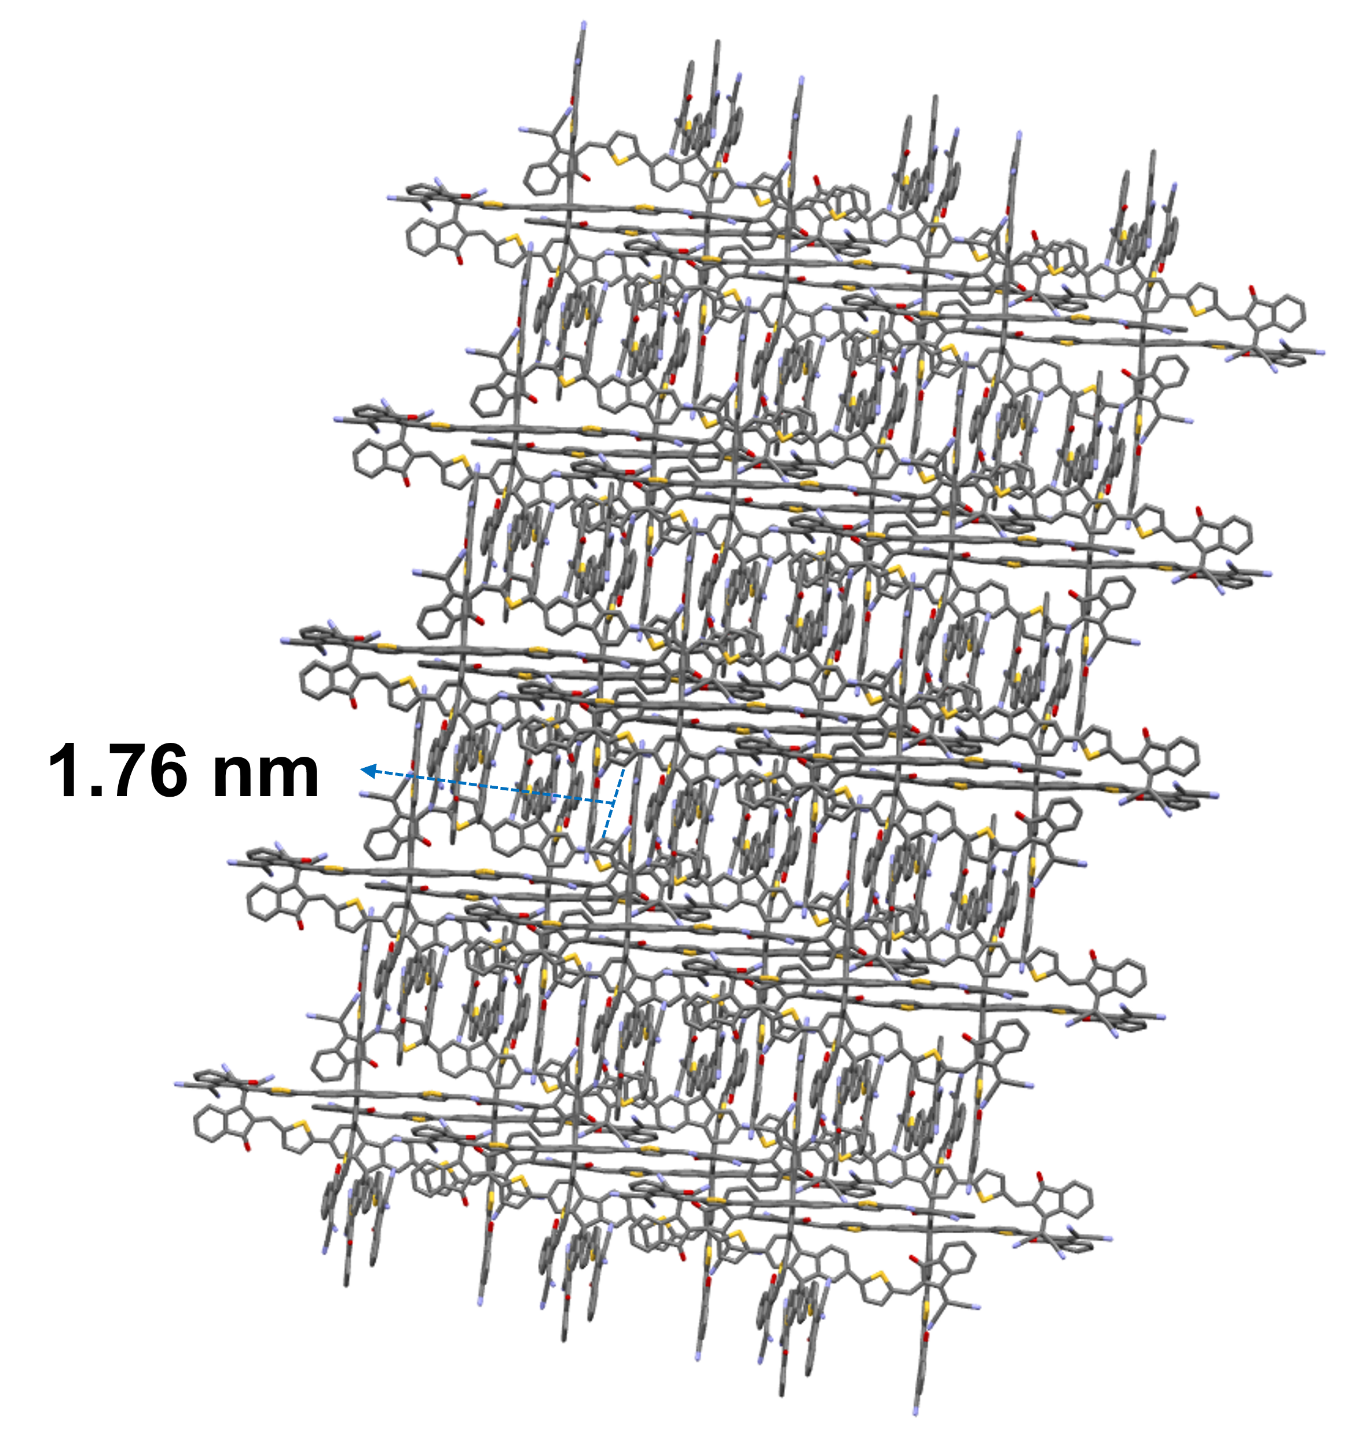


**Supplementary Fig. 6** | 3D porous network of πOF-1 in a side view with a pore channel of 1.76 nm height.


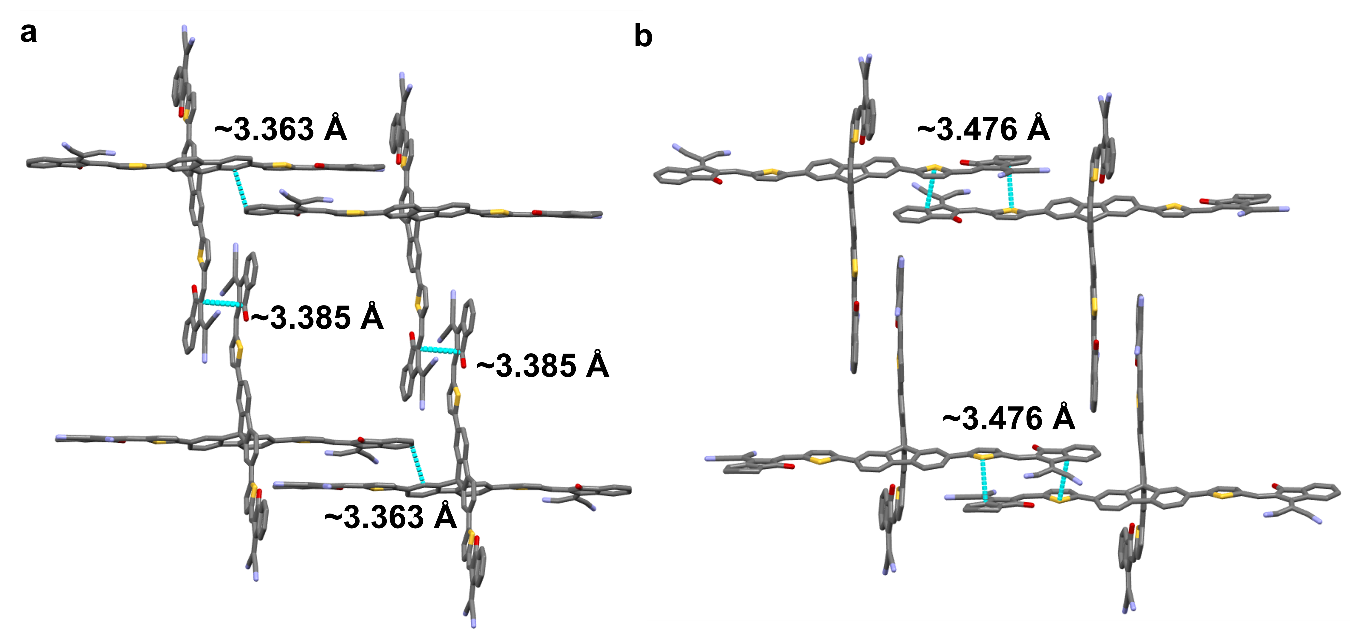


**Supplementary Fig. 7** | **a.** π-π interactions between two antiparallel end groups IC units with distances of 3.385 Å and face-on π-π interactions between IC unit and fluorene unit with distances of 3.363 Å. **b.** Face-on π-π interactions between IC unit and thiophene unit.


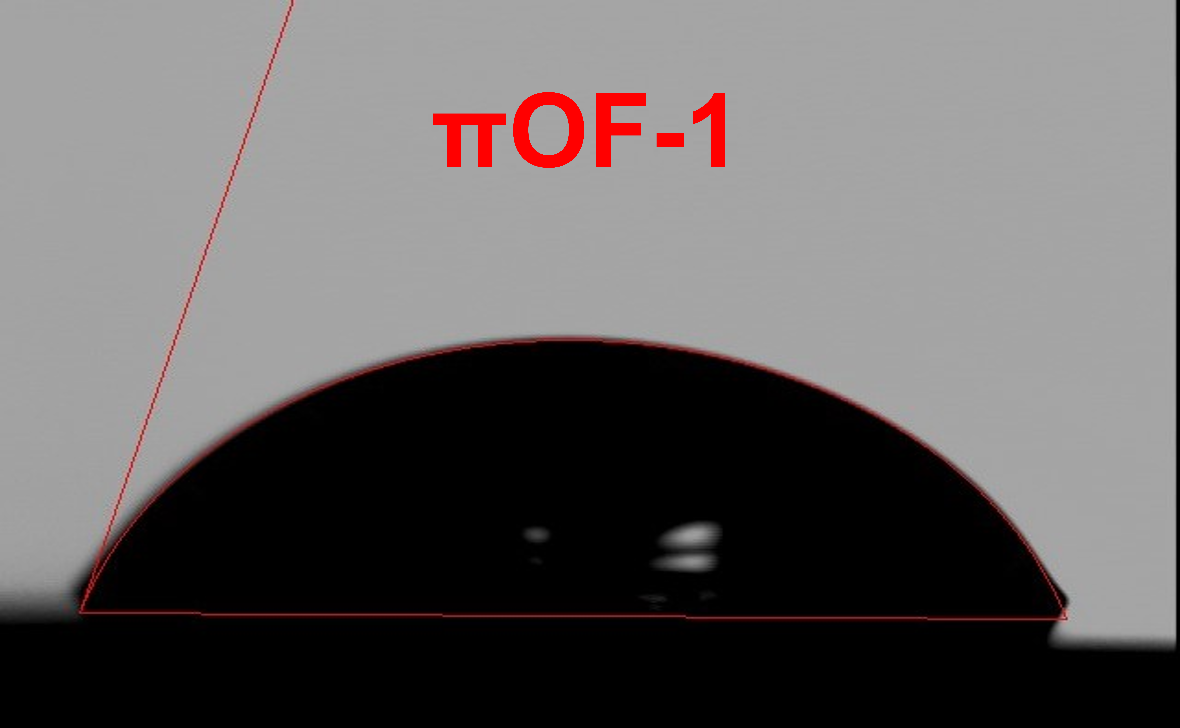


**Supplementary Fig. 8** | Water contact angle measurement on πOF-1 thin film with a moderate value of 71.9°, demonstrating enhanced surface hydrophilicity due to the incorporation of alkoxy side chains and nonfused-ring molecular design.


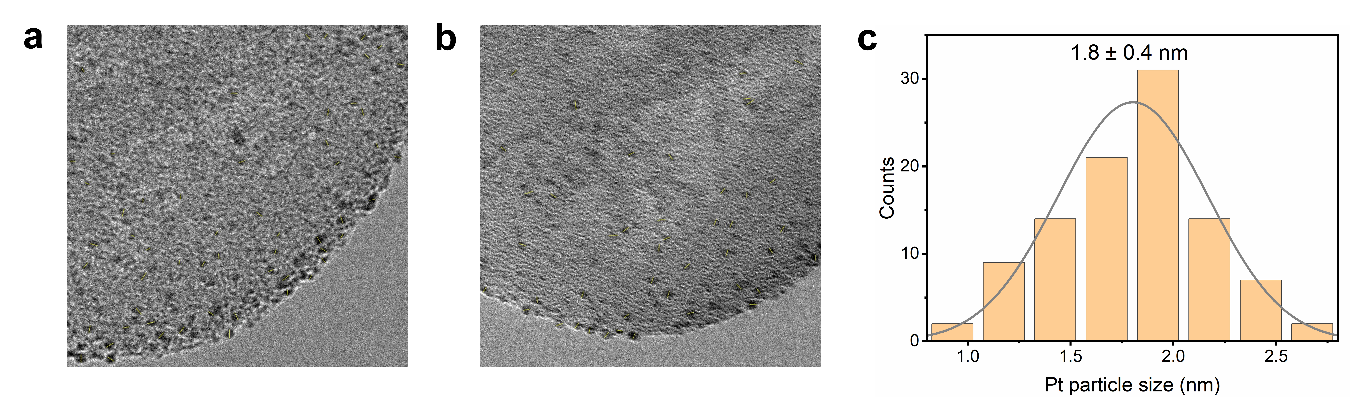


**Supplementary Fig. 9** | **a, b**, Cryo-EM images of πOF-1 particles. **c,** Pt particle size distribution histogram.


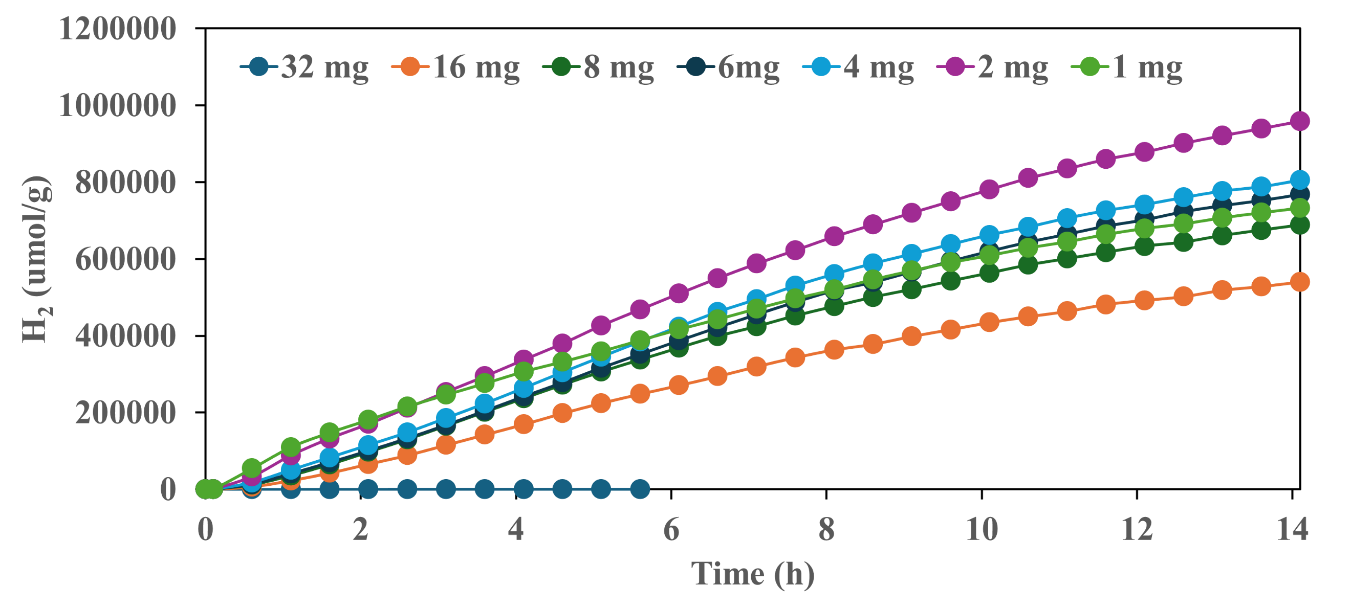


**Supplementary Fig. 10** | The hydrogen evolution activity of πOF-1@Pt particles with different TEBS ratios.


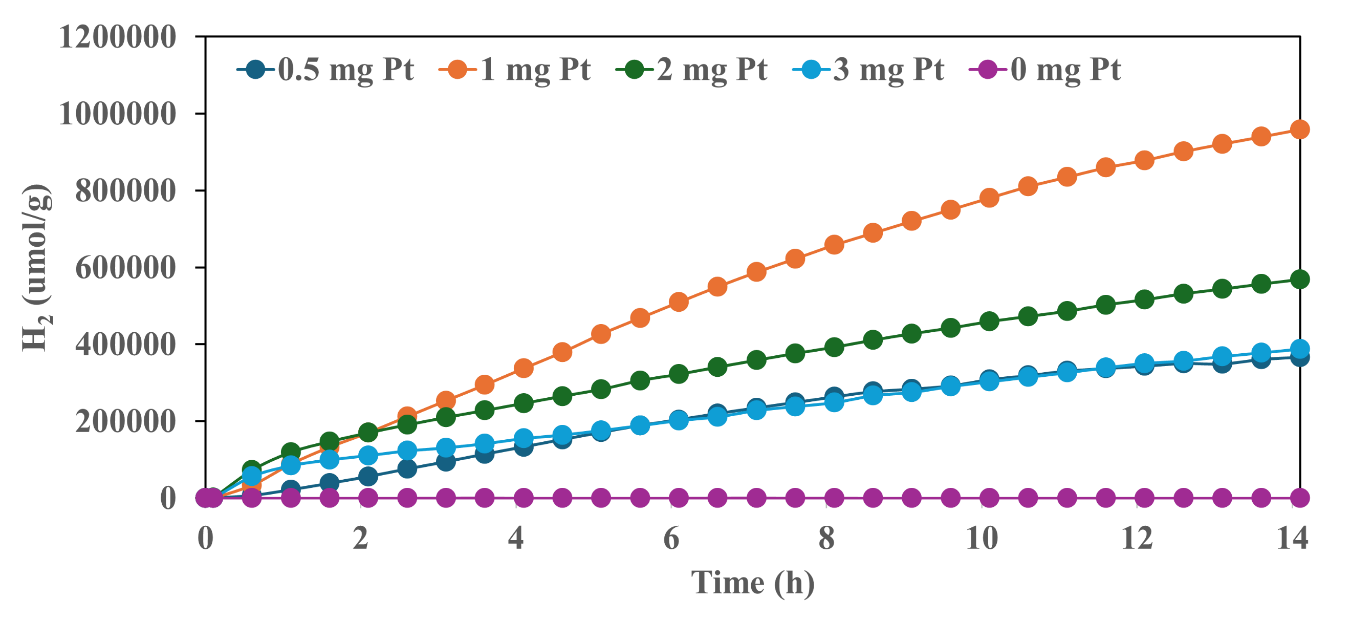


**Supplementary Fig. 11** | The hydrogen evolution activity of πOF-1@Pt particles with different Pt loading ratios.


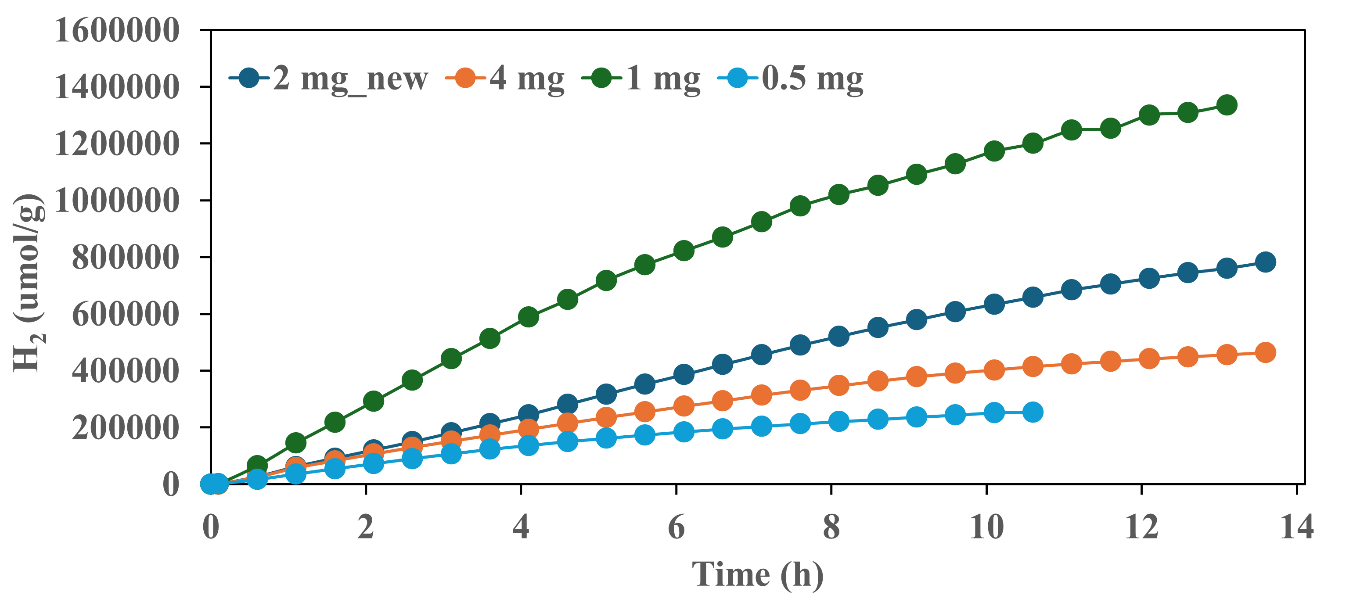


**Supplementary Fig. 12** | The hydrogen evolution activity of πOF-1@Pt particles with different πOF-1 concentrations.





**Supplementary Fig. 13** | UV-vis absorption spectra of πOF-1 particles aqueous solutions.





**Supplementary Fig. 14** | Stability tests. 15 h H2 evolution stability tests of πOF-1 particles. No degradation was observed.


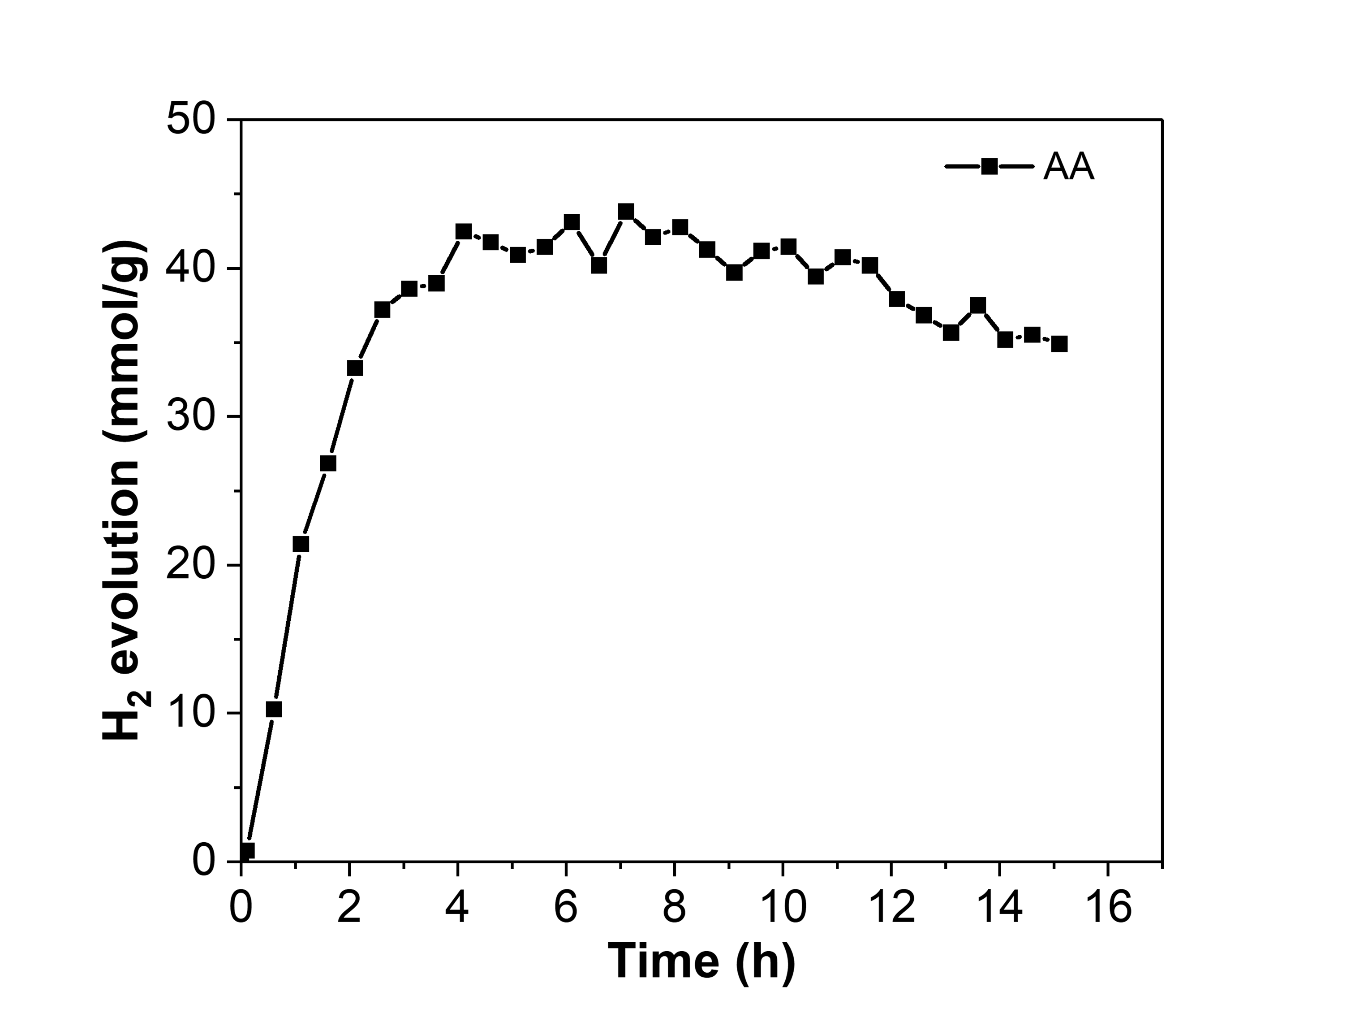


**Supplementary Fig. 15** | The hydrogen evolution activity of TiOx-modified Pt/πOF-1 photocatalyst under 1-sun illumination at 70 °C with complete depletion of AA as a sacrificial donor after 5 hours.





**Supplementary Fig. 16** | Cyclic voltammetric measurements of πOF-1. Cyclic voltammograms were recorded on an Epsilon electrochemical workstation using glassy carbon discs as the working electrode, Pt wire as the counter electrode, Ag/AgCl electrode as the reference electrode at a scanning rate of 100 mV/s. 0.1 M tetrabutylammoniumhexafluorophosphate (Bu4NPF6) dissolved in CH3CN was used as the supporting electrolyte.





**Supplementary Fig. 17** | Transient absorption spectra of πOF-1 ground state bleaching (GSB) between 550 nm and 750 nm following excitation at 580 nm.





**Supplementary Fig. 18** | Steady-state PL spectra of πOF-1 excited at 450 nm in water in the absence of Pt and AA, with AA and in the presence of both Pt and AA.


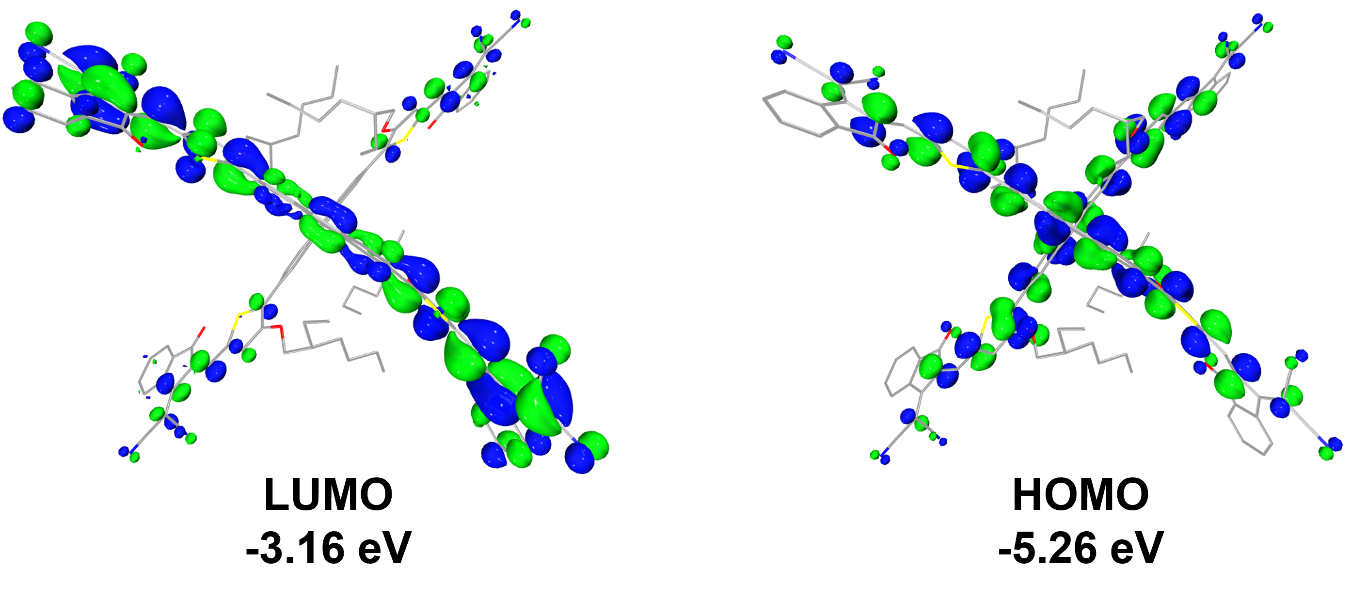


**Supplementary Fig. 19** | LUMO and HOMO of πOF-1 monomer.


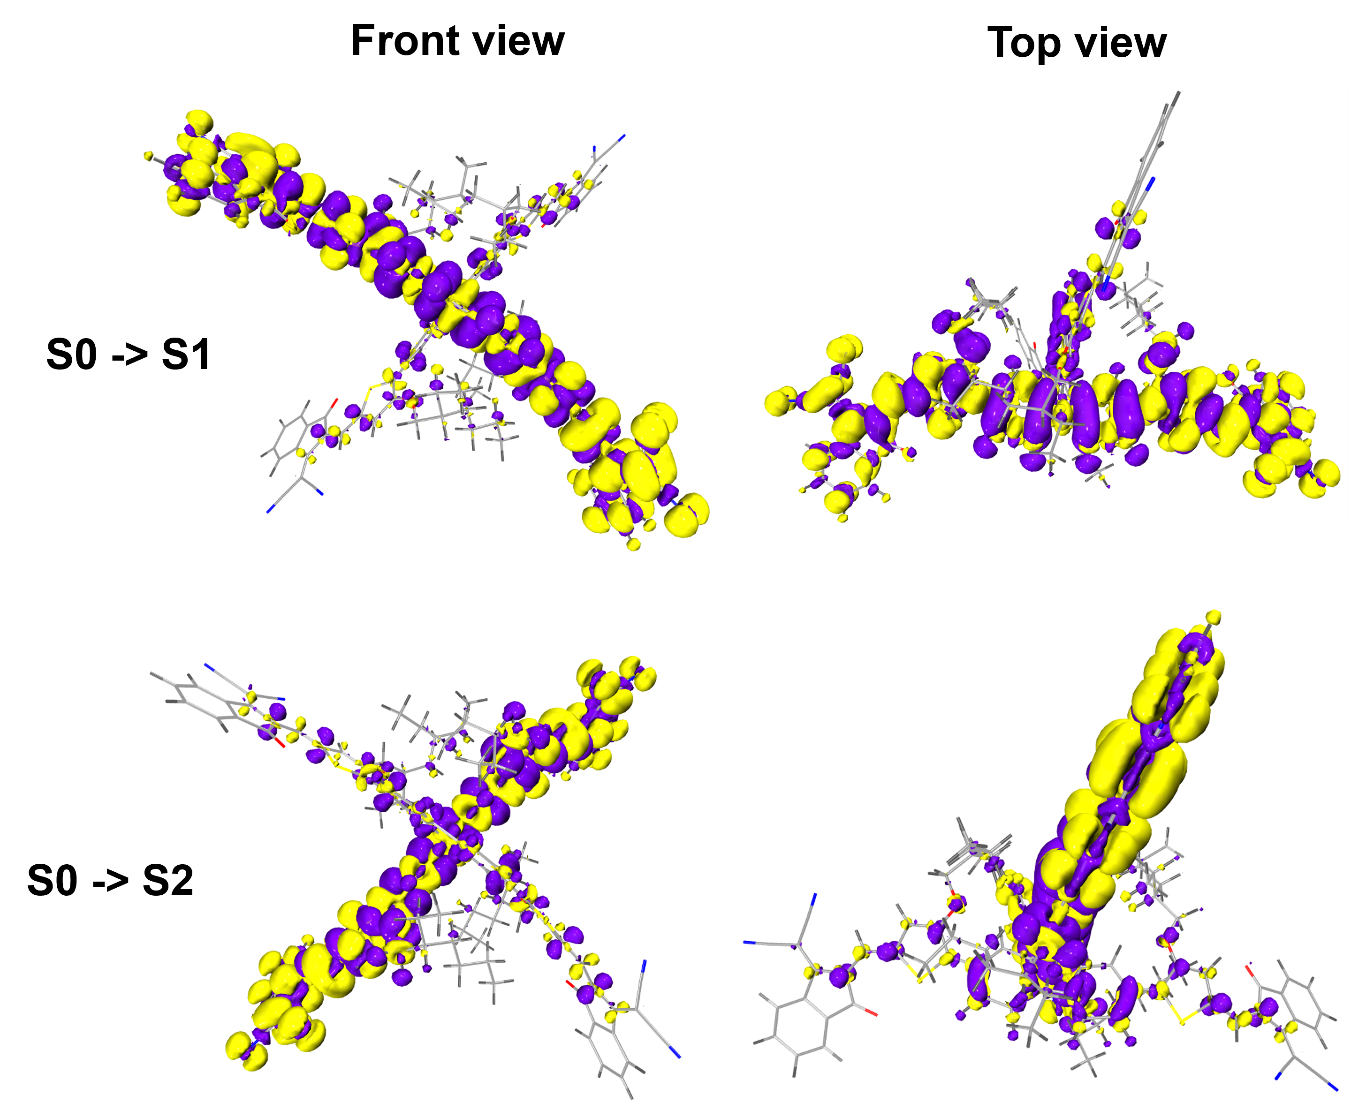


**Supplementary Fig. 20** | Electron density differences of degenerate excitations of πOF-1 monomer.


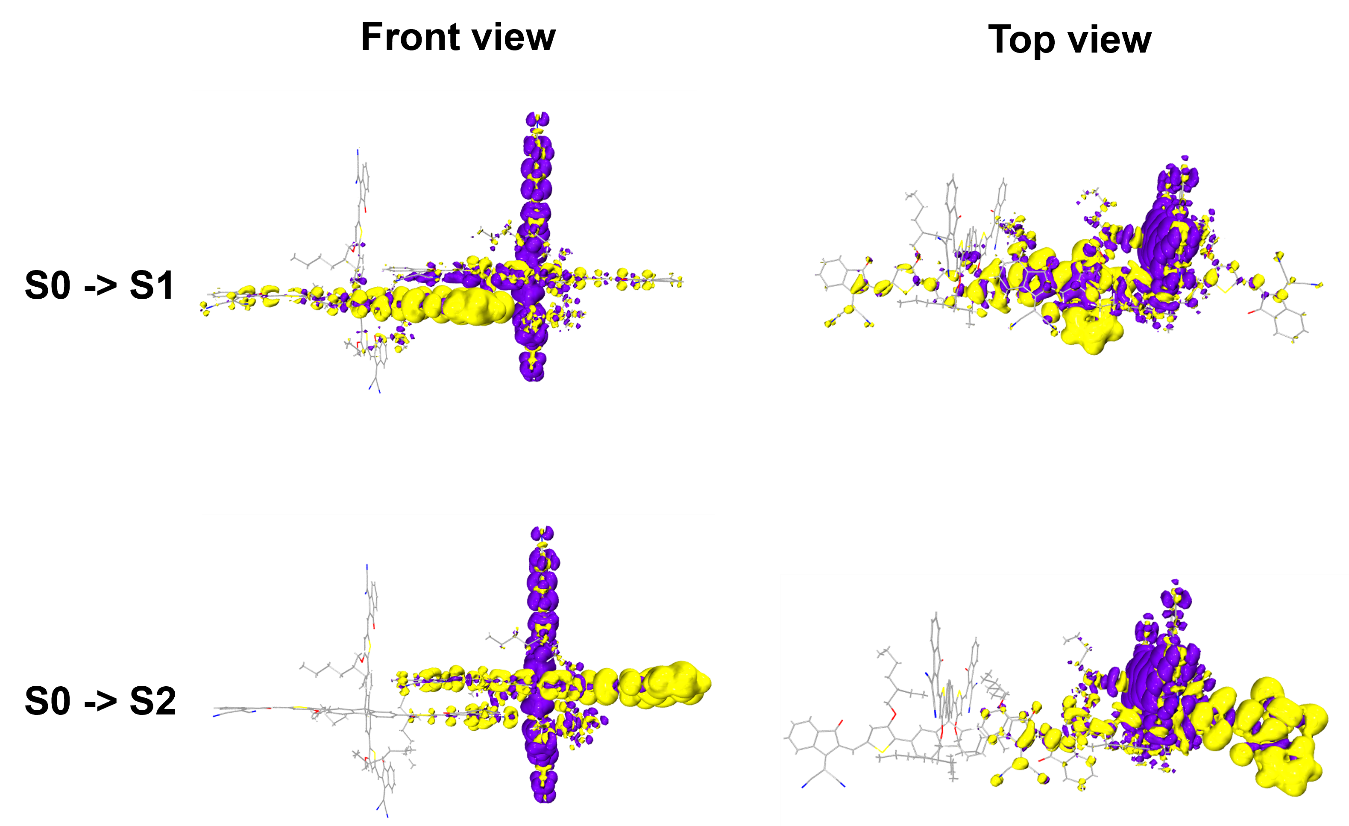


**Supplementary Fig. 21** | Electron density differences of degenerate excitations of πOF-1 dimer.

**Supplementary Table 1.** Crystal data and structure refinement for πOF-1

| CCDC number | 2387544 |
| --- | --- |
| Empirical formula | C125H104N8O8S4 |
| Formula weight | 1974.40 |
| Temperature [K] | 100(2) |
| Crystal system | monoclinic |
| Space group (number) | (14) |
| *a* [Å] | 18.1326(7) |
| *b* [Å] | 27.3855(11) |
| *c* [Å] | 25.9130(9) |
| α [°] | 90 |
| β [°] | 92.028(2) |
| γ [°] | 90 |
| Volume [Å3] | 12859.6(8) |
| *Z* | 4 |
| *ρ*calc [gcm−3] | 1.020 |
| *μ* [mm−1] | 1.089 |
| *F*(000) | 4152 |
| Crystal size [mm3] | 0.22×0.06×0.03 |
| Crystal colour | blue |
| Crystal shape | rod |
| Radiation | Cu*Kα* (λ=1.54178 Å) |
| 2θ range [°] | 5.85 to 109.08 (0.95 Å) |
| Index ranges | −19 ≤ h ≤ 19 −28 ≤ k ≤ 28 −27 ≤ l ≤ 27 |
| Reflections collected | 15745 |
| Independent reflections | 15745 *R*int = 0.1553 *R*sigma = 0.0529 |
| Completeness to  θ = 54.539° | 99.1 % |
| Data / Restraints / Parameters | 15745/4897/2129 |
| Absorption correction Tmin/Tmax (method) | 0.605213/0.750697 (multi-scan) |
| Goodness-of-fit on *F*2 | 1.371 |
| Final *R* indexes  [*I*≥2σ(*I*)] | *R*1 = 0.1267 w*R*2 = 0.3805 |
| Final *R* indexes  [all data] | *R*1 = 0.1477 w*R*2 = 0.3999 |
| Largest peak/hole [eÅ−3] | 0.77/−0.36 |

| Photocatalysts | Cocatalysts | Sacrificial Reagents | Light Source | HER rate  (mmol h-1 g-1) | Reference |
| --- | --- | --- | --- | --- | --- |
| PTB7-Th:EH-IDTBR | Pt | AA | Full-arc | 64.4 | 16 |
| F1 | Pt | AA | AM 1.5 G | 152.6 | 17 |
| Ho6-Cd0.76Ni0.24-NS | -- | TEOA | λ > 420 nm | 40.06 | 18 |
| CYANO-CON | Pt | AA | λ > 420 nm | 134.2 | 19 |
| H4TBAPy | Pt | AA | Full-arc | 358 | 20 |
| πOF-1 | Pt | AA | AM 1.5 G | 618 (at 70 °C) | This work |

**Supplementary Table 2.** The summary of the photocatalytic hydrogen evolution performances and reaction conditions of benchmark organic photocatalysts

**Supplementary Table 3.** UV-Vis absorption data of πOF‑1 particle in water, including absorbance (A) and absorptance (α), recorded from 450 nm to 750 nm.

| Wavelength (nm) | α (average)  (×100%) |
| --- | --- |
| 450 | 0.000951 |
| 460 | 0.000116 |
| 470 | 0.0041 |
| 480 | 0.0308 |
| 490 | 0.0756 |
| 500 | 0.13 |
| 510 | 0.197 |
| 520 | 0.274 |
| 530 | 0.352 |
| 540 | 0.427 |
| 550 | 0.493 |
| 560 | 0.548 |
| 570 | 0.593 |
| 580 | 0.628 |
| 590 | 0.655 |
| 600 | 0.673 |
| 610 | 0.684 |
| 620 | 0.69 |
| 630 | 0.693 |
| 640 | 0.696 |
| 650 | 0.697 |
| 660 | 0.693 |
| 670 | 0.679 |
| 680 | 0.65 |
| 690 | 0.6 |
| 700 | 0.522 |
| 710 | 0.414 |
| 720 | 0.289 |
| 730 | 0.171 |
| 740 | 0.0816 |
| 750 | 0.024 |

**References**

1 Ji, X. *et al.* A mixed hole transport material employing a highly planar conjugated molecule for efficient and stable perovskite solar cells. *Journal of Materials Chemistry A* **8**, 5163-5170 (2020).

2 Bruker. Bruker AXS Inc., Madison, Wisconsin, USA. *SAINT, V8.40B*.

3 Krause, L., Herbst-Irmer, R., Sheldrick, G. M. & Stalke, D. Comparison of silver and molybdenum microfocus X-ray sources for single-crystal structure determination. *J. Appl. Crystallogr.* **48**, 3-10 (2015).

4 Sheldrick, G. M. SHELXT - integrated space-group and crystal-structure determination. *Acta Crystallogr A Found Adv* **71**, 3-8 (2015).

5 Sheldrick, G. M. Crystal structure refinement with SHELXL. *Acta Crystallogr C Struct Chem* **71**, 3-8 (2015).

6 Hubschle, C. B., Sheldrick, G. M. & Dittrich, B. ShelXle: a Qt graphical user interface for SHELXL. *J. Appl. Crystallogr.* **44**, 1281-1284 (2011).

7 Spek, A. L. Single-crystal structure validation with the programPLATON. *J. Appl. Crystallogr.* **36**, 7-13 (2003).

8 Spek, A. L. Structure validation in chemical crystallography. *Acta Crystallogr D Biol Crystallogr* **65**, 148-155 (2009).

9 Spek, A. L. PLATON SQUEEZE: a tool for the calculation of the disordered solvent contribution to the calculated structure factors. *Acta Crystallogr C Struct Chem* **71**, 9-18 (2015).

10 Kratzert, D. *FinalCif, V131,* [*https://dkratzert.de/finalcif.html*](https://dkratzert.de/finalcif.html).

11 Zhao, T. *et al.* A coating strategy to achieve effective local charge separation for photocatalytic coevolution. *Proc Natl Acad Sci U S A* **118** (2021).

12 Zhao, Y. *et al.* Enzyme-Catalyzed Synthesis of Water-Soluble Conjugated Poly[2-(3-thienyl)-Ethoxy-4-Butylsulfonate]. *Polymers (Basel)* **8** (2016).

13 Kresse, G. & Furthmüller, J. Efficiency of ab-initio total energy calculations for metals and semiconductors using a plane-wave basis set. *Computational Materials Science* **6**, 15-50 (1996).

14 Sun, J., Ruzsinszky, A. & Perdew, J. P. Strongly Constrained and Appropriately Normed Semilocal Density Functional. *Phys. Rev. Lett.* **115**, 036402 (2015).

15 Kresse, G. & Joubert, D. From ultrasoft pseudopotentials to the projector augmented-wave method. *Physical Review B* **59**, 1758-1775 (1999).

16 Kosco, J. *et al.* Enhanced photocatalytic hydrogen evolution from organic semiconductor heterojunction nanoparticles. *Nat Mater* **19**, 559-565 (2020).

17 Zhu, Y. *et al.* Organic Photovoltaic Catalyst with Extended Exciton Diffusion for High-Performance Solar Hydrogen Evolution. *J Am Chem Soc* **144**, 12747-12755 (2022).

18 Zhang, S. *et al.* Organizing Photosensitive and Photothermal Single-Sites Uniformly in a Trimetallic Metal-Organic Framework for Efficient Photocatalytic Hydrogen Evolution. *Adv. Mater.* **36**, e2403464 (2024).

19 Li, C. *et al.* Covalent organic frameworks with high quantum efficiency in sacrificial photocatalytic hydrogen evolution. *Nat Commun* **13**, 2357 (2022).

20 Zhou, Q., Guo, Y. & Zhu, Y. Photocatalytic sacrificial H2 evolution dominated by micropore-confined exciton transfer in hydrogen-bonded organic frameworks. *Nature Catalysis* **6**, 574-584 (2023).
